# Supplementary material for: Genome-Environment Association Analysis for Bio-Climatic Variables in Common Bean (Phaseolus vulgaris L.) from Brazil
Source: MDPI journal article supplement (doi:10.3390/plants10081572), 2021-07-30
Supplement: s1 [file s1]

**S2 Table** Common bean accessions used for multiplexed sequencing and their respective barcodes.

| <b>Code</b> | <b>Accession</b>       | <b>Gene pool</b> | <b>Barcoded sequence</b> |
|-------------|------------------------|------------------|--------------------------|
| BL_1        | Brigida                | M                | AACT                     |
| BL_2        | Coção                  | A                | CCAG                     |
| BL_3        | Bagajó                 | A                | TTGA                     |
| BL_4        | Favita                 | A                | GGTA                     |
| BL_5        | Canarinho              | A                | ATTG                     |
| BL_6        | Rosinha Claro          | M                | CGGT                     |
| BL_7        | Chita fina             | A                | TGCG                     |
| BL_8        | Jaula                  | A                | GTAT                     |
| BL_9        | Pintado                | A                | AACCT                    |
| BL_10       | Bolinha                | M                | CCACG                    |
| BL_11       | Praia                  | A                | TATAT                    |
| BL_12       | Camarão                | A                | GAGCG                    |
| BL_13       | BSF-1 Creme            | A                | ACAAT                    |
| BL_14       | BSF-2 Pingo de Ouro    | M                | CTCTG                    |
| BL_15       | BSF-3 Fogo na serra    | A                | TCTGG                    |
| BL_16       | Brilhoso Mulatinho     | M                | CGGCT                    |
| BL_18       | Africano 4             | A                | ATTAG                    |
| BL_19       | IPA 1 Mulatinho        | M                | TGCCG                    |
| BL_20       | IPA 7 Mulatinho        | M                | GTGGT                    |
| BL_24       | Mulatinho de Cacho     | M                | CACAA                    |
| BL_25       | Mulatinho              | M                | GGAAG                    |
| BL_26       | Tachinha Mulatinho     | M                | TCCTT                    |
| BL_27       | Mulatão                | A                | AATGA                    |
| BL_28       | Bairasa 2              | M                | ATGCA                    |
| BL_29       | Milagre de Sto Antônio | M                | CCTTA                    |
| BL_30       | Flor Azul              | M                | CTAGA                    |
| BL_31       | Bico de ouro           | M                | TGGAA                    |
| BL_33       | Feijão mulatinho       | M                | GCCGA                    |
| BL_34       | Feijão Laje            | M                | AGCTA                    |
| BL_35       | Caiaminha              | M                | CATACG                   |
| BL_41       | CLPE7                  | M                | CCATCG                   |
| BL_50       | CLPE17                 | M                | ATGCCT                   |
| BL_57       | Feijão Preto           | M                | TCAGGT                   |
| BL_64       | Feijão Colorido        | A                | CAGGTT                   |
| BL_65       | Feijão Preto           | M                | GTCCAT                   |
| BL_66       | Feijão Carioca         | M                | TGATCA                   |
| BL_67       | Feijão Carioca         | M                | TCTGAG                   |
| BL_68       | Feijão Mulatinho       | M                | GTGACA                   |
| BL_69       | Feijão Mulatinho       | M                | CGCAAT                   |
| BL_70       | Feijão Carioca         | M                | GCGTAG                   |
| BL_71       | Feijão Mulatinho       | M                | TAAGCCG                  |
| BL_72       | Feijão Colorido        | A                | ATTCGCG                  |
| BL_73       | Feijão Colorido        | A                | GGATCCG                  |
| BL_74       | Favita                 | A                | CACATCG                  |
| BL_75       | Favita                 | A                | ATGGCCG                  |

| <b>Code</b> | <b>Accession</b>    | <b>Gene pool</b> | <b>Barcoded sequence</b> |
|-------------|---------------------|------------------|--------------------------|
| BL_76       | Feijão Carioca      | M                | TGACGCG                  |
| BL_77       | Enxofre             | A                | GATACCG                  |
| BL_78       | Favita              | A                | ACCTTCG                  |
| BL_79       | Favita              | A                | CTAGGCG                  |
| BL_80       | Feijão Preto        | M                | TATCTCG                  |
| BL_81       | Feijão Preto        | M                | TGGACCG                  |
| BL_82       | Feijão Carioca      | M                | GTCAGCG                  |
| BL_83       | Feijão Preto        | M                | AGTGTCTG                 |
| BL_84       | Feijão Preto        | M                | GAGTTCG                  |
| BL_85       | Feijão Carioca      | M                | CCTAGCG                  |
| BL_86       | Feijão Preto        | M                | CCACTCG                  |
| BL_87       | Feijão Carioca      | M                | TTCTACG                  |
| BL_88       | Feijão Mulatinho    | M                | GAGGCCT                  |
| BL_89       | Feijão Branco       | M                | CGTCACG                  |
| BL_90       | Feijão Preto        | M                | ACACGCT                  |
| BL_91       | Feijão Preto        | M                | ATCTCGG                  |
| BL_92       | Feijão Mulatinho    | M                | GGAGGCT                  |
| BL_93       | Feijão Colorido     | A                | TAGCCTG                  |
| BL_94       | Favita              | A                | TTAATCG                  |
| BL_95       | Feijão Preto        | M                | ACCTGTT                  |
| BL_96       | Feijão Mulatinho    | M                | CGTACGG                  |
| BL_97       | Feijão Preto        | M                | CCGGACT                  |
| BL_98       | Feijão colorido     | A                | GACCTTG                  |
| BL_99       | Feijão Preto        | M                | ATGTGCT                  |
| BL_100      | Feijão Mulatinho    | M                | GTAGCGG                  |
| BL_101      | Feijão Mulatinho    | M                | TGTAGCT                  |
| BL_102      | Feijão Preto        | M                | CACTATG                  |
| BL_103      | Feijão Preto        | M                | ACTCCGT                  |
| BL_104      | Feijão Colorido     | M                | CAGGTGG                  |
| BL_105      | Feijão Mulatinho    | M                | TGACATT                  |
| BL_106      | BG-4                | M                | GCTTACG                  |
| BL_107      | BG-9                | M                | TTCACTCG                 |
| BL_108      | BG-13               | M                | GAGGTCCG                 |
| BL_109      | BG-17               | M                | AGATGGCG                 |
| BL_110      | BG-18               | M                | CCTACTCG                 |
| BL_111      | BG-23               | M                | ATCCTCCG                 |
| BL_165      | Pitanga             | A                | TGCCG                    |
| BL_166      | Corinthiano         | A                | AATGA                    |
| BL_168      | Jalo Vermelho       | A                | TATCGG                   |
| BL_170      | Jalo Listras Pretas | A                | ACGCTG                   |
| BL_172      | BGF 20              | A                | GGTA                     |
| BL_181      | MT 50G2             | M                | ATTG                     |
| BL_183      | MT 55               | M                | ACGTG                    |
| BL_184      | MT 57G1             | M                | CCTTA                    |
| BL_186      | MT 62               | M                | AAGTCG                   |
| BL_187      | MT 73G1             | M                | CGGATG                   |
| BL_189      | MT 79               | M                | CTGGAG                   |

| <b>Code</b> | <b>Accession</b>    | <b>Gene pool</b> | <b>Barcoded sequence</b> |
|-------------|---------------------|------------------|--------------------------|
| BL_194      | MT 92               | M                | CGGT                     |
| BL_199      | Enxofre             | A                | TCGACG                   |
| BL_215      | Favita              | A                | TAAGCCG                  |
| BL_216      | Feijão Carioca      | M                | GTAT                     |
| BL_220      | Jalo Pintado 2      | A                | AGTCCG                   |
| BL_222      | Gordo               | A                | GCTATG                   |
| BL_223      | Feijão Mulatinho    | M                | CAGGTT                   |
| BL_224      | Mulatinho           | M                | ATTCGCG                  |
| BL_225      | Sempre Assim Branco | M                | GGATCCG                  |
| BL_226      | CLPE3               | M                | CACATCG                  |
| BL_227      | CLPE4               | M                | ATGGCCG                  |
| BL_228      | CLPE8               | M                | TGACGCG                  |
| BL_229      | CLPE10              | M                | GATACCG                  |
| BL_230      | CLPE11              | M                | ACCTTCG                  |
| BL_231      | CLPE12              | M                | CTAGGCG                  |
| BL_232      | CLPE14              | M                | TATCTCG                  |
| BL_233      | CLPE15              | M                | TGGACCG                  |
| BL_234      | Feijão Preto        | M                | GTCAGCG                  |

A= Andean, M=Mesoamerican
