# Supplementary material for: Genome-Environment Association Analysis for Bio-Climatic Variables in Common Bean (Phaseolus vulgaris L.) from Brazil
Source: MDPI journal article supplement (doi:10.3390/plants10081572), 2021-07-30
Supplement: s1 [file s1]

**S1 Table** Trait, *Phaseolus vulgaris* chromosome (Chr), Single Nucleotide Polymorphism (SNP) markers, SNP position (bp),  $p$  value,  $-\log(p)$  value) of 110 common bean accessions.

| Trait | Chr | SNP marker   | Position (bp) | $p$ value | $\text{Log}(p)$ |
|-------|-----|--------------|---------------|-----------|-----------------|
| BIO1  | 2   | S02_4770785  | 4770785       | 8.96E-04  | 3.05            |
| BIO2  | 1   | S01_43225566 | 43225566      | 3.50E-04  | 3.46            |
| BIO2  | 9   | S09_35475381 | 35475381      | 6.50E-04  | 3.19            |
| BIO3  | 9   | S09_35475381 | 35475381      | 4.57E-06  | 5.34            |
| BIO3  | 11  | S11_45868325 | 45868325      | 4.20E-05  | 4.38            |
| BIO3  | 11  | S11_45871518 | 45871518      | 4.42E-05  | 4.35            |
| BIO3  | 9   | S09_30671474 | 30671474      | 4.53E-05  | 4.34            |
| BIO3  | 11  | S11_46009051 | 46009051      | 4.66E-05  | 4.33            |
| BIO3  | 11  | S11_46026466 | 46026466      | 4.66E-05  | 4.33            |
| BIO3  | 11  | S11_46039222 | 46039222      | 4.66E-05  | 4.33            |
| BIO3  | 11  | S11_46086409 | 46086409      | 4.66E-05  | 4.33            |
| BIO3  | 11  | S11_46114790 | 46114790      | 4.66E-05  | 4.33            |
| BIO3  | 2   | S02_46562876 | 46562876      | 5.16E-05  | 4.29            |
| BIO3  | 2   | S02_46767945 | 46767945      | 5.16E-05  | 4.29            |
| BIO3  | 2   | S02_46774037 | 46774037      | 5.16E-05  | 4.29            |
| BIO3  | 2   | S02_46778765 | 46778765      | 5.16E-05  | 4.29            |
| BIO3  | 9   | S09_16894313 | 16894313      | 5.16E-05  | 4.29            |
| BIO3  | 9   | S09_17041160 | 17041160      | 5.16E-05  | 4.29            |
| BIO3  | 11  | S11_48564887 | 48564887      | 5.25E-05  | 4.28            |
| BIO3  | 11  | S11_48574427 | 48574427      | 5.25E-05  | 4.28            |
| BIO3  | 11  | S11_48590179 | 48590179      | 5.25E-05  | 4.28            |
| BIO3  | 11  | S11_48595485 | 48595485      | 5.25E-05  | 4.28            |
| BIO3  | 11  | S11_48673230 | 48673230      | 5.25E-05  | 4.28            |
| BIO3  | 11  | S11_48691105 | 48691105      | 5.25E-05  | 4.28            |
| BIO3  | 11  | S11_48717102 | 48717102      | 5.25E-05  | 4.28            |
| BIO3  | 11  | S11_48754682 | 48754682      | 5.25E-05  | 4.28            |
| BIO3  | 11  | S11_48769163 | 48769163      | 5.25E-05  | 4.28            |
| BIO3  | 11  | S11_48771356 | 48771356      | 5.25E-05  | 4.28            |
| BIO3  | 11  | S11_48790698 | 48790698      | 5.25E-05  | 4.28            |
| BIO3  | 11  | S11_48890465 | 48890465      | 5.25E-05  | 4.28            |
| BIO3  | 11  | S11_45901957 | 45901957      | 5.30E-05  | 4.28            |
| BIO3  | 11  | S11_45976959 | 45976959      | 5.30E-05  | 4.28            |
| BIO3  | 11  | S11_45979384 | 45979384      | 5.30E-05  | 4.28            |
| BIO3  | 11  | S11_48597386 | 48597386      | 5.42E-05  | 4.27            |
| BIO3  | 2   | S02_46636403 | 46636403      | 5.49E-05  | 4.26            |
| BIO3  | 11  | S11_45915796 | 45915796      | 5.81E-05  | 4.24            |
| BIO3  | 11  | S11_45927074 | 45927074      | 5.81E-05  | 4.24            |
| BIO3  | 2   | S02_46595538 | 46595538      | 5.99E-05  | 4.22            |
| BIO3  | 9   | S09_36970219 | 36970219      | 1.04E-04  | 3.98            |
| BIO3  | 9   | S09_36440025 | 36440025      | 1.08E-04  | 3.97            |
| BIO3  | 1   | S01_48656150 | 48656150      | 1.83E-04  | 3.74            |
| BIO3  | 7   | S07_44301353 | 44301353      | 2.36E-04  | 3.63            |
| BIO3  | 11  | S11_48916743 | 48916743      | 2.50E-04  | 3.60            |
| BIO3  | 9   | S09_4156404  | 4156404       | 2.51E-04  | 3.60            |

| <b>Trait</b> | <b>Chr</b> | <b>SNP marker</b> | <b>Position (bp)</b> | <b>p value</b> | <b>Log (p)</b> |
|--------------|------------|-------------------|----------------------|----------------|----------------|
| BIO3         | 5          | S05_8091228       | 8091228              | 3.11E-04       | 3.51           |
| BIO3         | 6          | S06_13603868      | 13603868             | 3.11E-04       | 3.51           |
| BIO3         | 10         | S10_35224450      | 35224450             | 3.28E-04       | 3.48           |
| BIO3         | 3          | S03_1711893       | 1711893              | 3.41E-04       | 3.47           |
| BIO3         | 2          | S02_16724601      | 16724601             | 3.87E-04       | 3.41           |
| BIO3         | 4          | S04_19798525      | 19798525             | 4.87E-04       | 3.31           |
| BIO3         | 11         | S11_48535510      | 48535510             | 5.38E-04       | 3.27           |
| BIO3         | 9          | S09_35467033      | 35467033             | 5.95E-04       | 3.23           |
| BIO3         | 3          | S03_27967812      | 27967812             | 8.25E-04       | 3.08           |
| BIO3         | 1          | S01_43225566      | 43225566             | 8.78E-04       | 3.06           |
| BIO4         | 9          | S09_35475381      | 35475381             | 4.07E-08       | 7.39           |
| BIO6         | 9          | S09_35475381      | 35475381             | 1.69E-05       | 4.77           |
| BIO6         | 4          | S04_37237235      | 37237235             | 2.56E-04       | 3.59           |
| BIO6         | 4          | S04_41844379      | 41844379             | 3.45E-04       | 3.46           |
| BIO6         | 4          | S04_41850026      | 41850026             | 3.45E-04       | 3.46           |
| BIO6         | 4          | S04_41819945      | 41819945             | 3.46E-04       | 3.46           |
| BIO6         | 4          | S04_41865996      | 41865996             | 3.46E-04       | 3.46           |
| BIO6         | 4          | S04_41921556      | 41921556             | 3.46E-04       | 3.46           |
| BIO6         | 11         | S11_46009051      | 46009051             | 3.55E-04       | 3.45           |
| BIO6         | 11         | S11_46026466      | 46026466             | 3.55E-04       | 3.45           |
| BIO6         | 11         | S11_46039222      | 46039222             | 3.55E-04       | 3.45           |
| BIO6         | 11         | S11_46086409      | 46086409             | 3.55E-04       | 3.45           |
| BIO6         | 11         | S11_46114790      | 46114790             | 3.55E-04       | 3.45           |
| BIO6         | 11         | S11_45901957      | 45901957             | 3.72E-04       | 3.43           |
| BIO6         | 11         | S11_45871518      | 45871518             | 3.73E-04       | 3.43           |
| BIO6         | 11         | S11_45976959      | 45976959             | 3.73E-04       | 3.43           |
| BIO6         | 11         | S11_45979384      | 45979384             | 3.73E-04       | 3.43           |
| BIO6         | 4          | S04_37276206      | 37276206             | 3.81E-04       | 3.42           |
| BIO6         | 4          | S04_37323374      | 37323374             | 3.81E-04       | 3.42           |
| BIO6         | 4          | S04_37395494      | 37395494             | 3.81E-04       | 3.42           |
| BIO6         | 4          | S04_37402766      | 37402766             | 3.81E-04       | 3.42           |
| BIO6         | 4          | S04_37414095      | 37414095             | 3.81E-04       | 3.42           |
| BIO6         | 4          | S04_37419720      | 37419720             | 3.81E-04       | 3.42           |
| BIO6         | 11         | S11_45868325      | 45868325             | 3.84E-04       | 3.42           |
| BIO6         | 11         | S11_45927074      | 45927074             | 3.89E-04       | 3.41           |
| BIO6         | 11         | S11_45915796      | 45915796             | 3.90E-04       | 3.41           |
| BIO6         | 4          | S04_36860255      | 36860255             | 3.91E-04       | 3.41           |
| BIO6         | 4          | S04_36862905      | 36862905             | 3.91E-04       | 3.41           |
| BIO6         | 4          | S04_36898781      | 36898781             | 3.91E-04       | 3.41           |
| BIO6         | 4          | S04_36904123      | 36904123             | 3.91E-04       | 3.41           |
| BIO6         | 4          | S04_36923093      | 36923093             | 3.91E-04       | 3.41           |
| BIO6         | 4          | S04_37014401      | 37014401             | 3.91E-04       | 3.41           |
| BIO6         | 4          | S04_37044048      | 37044048             | 3.91E-04       | 3.41           |
| BIO6         | 4          | S04_37127964      | 37127964             | 3.91E-04       | 3.41           |
| BIO6         | 4          | S04_37171730      | 37171730             | 3.91E-04       | 3.41           |
| BIO6         | 4          | S04_37230271      | 37230271             | 3.91E-04       | 3.41           |
| BIO6         | 4          | S04_37233909      | 37233909             | 3.91E-04       | 3.41           |

| <b>Trait</b> | <b>Chr</b> | <b>SNP marker</b> | <b>Position (bp)</b> | <b>p value</b> | <b>Log (p)</b> |
|--------------|------------|-------------------|----------------------|----------------|----------------|
| BIO6         | 4          | S04_37244713      | 37244713             | 3.91E-04       | 3.41           |
| BIO6         | 4          | S04_37261263      | 37261263             | 3.91E-04       | 3.41           |
| BIO6         | 4          | S04_37352176      | 37352176             | 3.91E-04       | 3.41           |
| BIO6         | 4          | S04_37389504      | 37389504             | 3.91E-04       | 3.41           |
| BIO6         | 4          | S04_37403736      | 37403736             | 3.91E-04       | 3.41           |
| BIO6         | 4          | S04_37404528      | 37404528             | 3.91E-04       | 3.41           |
| BIO6         | 4          | S04_37404856      | 37404856             | 3.91E-04       | 3.41           |
| BIO6         | 4          | S04_37412126      | 37412126             | 3.91E-04       | 3.41           |
| BIO6         | 4          | S04_37413884      | 37413884             | 3.91E-04       | 3.41           |
| BIO6         | 4          | S04_37426790      | 37426790             | 3.91E-04       | 3.41           |
| BIO6         | 4          | S04_37432423      | 37432423             | 3.91E-04       | 3.41           |
| BIO6         | 4          | S04_37452775      | 37452775             | 3.91E-04       | 3.41           |
| BIO6         | 4          | S04_37490566      | 37490566             | 3.91E-04       | 3.41           |
| BIO6         | 4          | S04_37501169      | 37501169             | 3.91E-04       | 3.41           |
| BIO6         | 4          | S04_36739231      | 36739231             | 5.31E-04       | 3.27           |
| BIO6         | 4          | S04_36792247      | 36792247             | 5.31E-04       | 3.27           |
| BIO6         | 4          | S04_36807595      | 36807595             | 5.31E-04       | 3.27           |
| BIO6         | 4          | S04_36858132      | 36858132             | 5.31E-04       | 3.27           |
| BIO6         | 4          | S04_36859433      | 36859433             | 5.31E-04       | 3.27           |
| BIO6         | 4          | S04_36860736      | 36860736             | 5.31E-04       | 3.27           |
| BIO6         | 4          | S04_36862528      | 36862528             | 5.31E-04       | 3.27           |
| BIO6         | 4          | S04_36867546      | 36867546             | 5.31E-04       | 3.27           |
| BIO6         | 4          | S04_36891598      | 36891598             | 5.31E-04       | 3.27           |
| BIO6         | 4          | S04_36915727      | 36915727             | 5.31E-04       | 3.27           |
| BIO6         | 4          | S04_36920211      | 36920211             | 5.31E-04       | 3.27           |
| BIO6         | 4          | S04_36967857      | 36967857             | 5.31E-04       | 3.27           |
| BIO6         | 4          | S04_36984541      | 36984541             | 5.31E-04       | 3.27           |
| BIO6         | 4          | S04_37002724      | 37002724             | 5.31E-04       | 3.27           |
| BIO6         | 4          | S04_37133177      | 37133177             | 5.31E-04       | 3.27           |
| BIO6         | 4          | S04_37165570      | 37165570             | 5.31E-04       | 3.27           |
| BIO6         | 11         | S11_1102750       | 1102750              | 6.66E-04       | 3.18           |
| BIO6         | 11         | S11_1085196       | 1085196              | 6.94E-04       | 3.16           |
| BIO6         | 11         | S11_1095899       | 1095899              | 6.94E-04       | 3.16           |
| BIO6         | 11         | S11_1103513       | 1103513              | 6.94E-04       | 3.16           |
| BIO6         | 11         | S11_1105090       | 1105090              | 6.94E-04       | 3.16           |
| BIO6         | 11         | S11_1208261       | 1208261              | 6.94E-04       | 3.16           |
| BIO6         | 11         | S11_1208868       | 1208868              | 6.94E-04       | 3.16           |
| BIO6         | 11         | S11_1212440       | 1212440              | 6.94E-04       | 3.16           |
| BIO6         | 11         | S11_1213505       | 1213505              | 6.94E-04       | 3.16           |
| BIO6         | 11         | S11_1222947       | 1222947              | 6.94E-04       | 3.16           |
| BIO6         | 11         | S11_1247658       | 1247658              | 6.94E-04       | 3.16           |
| BIO6         | 11         | S11_1262430       | 1262430              | 6.94E-04       | 3.16           |
| BIO6         | 3          | S03_27967812      | 27967812             | 7.09E-04       | 3.15           |
| BIO6         | 10         | S10_35224450      | 35224450             | 7.86E-04       | 3.10           |
| BIO6         | 9          | S09_35467033      | 35467033             | 8.64E-04       | 3.06           |
| BIO6         | 7          | S07_44301353      | 44301353             | 8.97E-04       | 3.05           |
| BIO6         | 4          | S04_36754502      | 36754502             | 9.02E-04       | 3.04           |

| <b>Trait</b> | <b>Chr</b> | <b>SNP marker</b> | <b>Position (bp)</b> | <b>p value</b> | <b>Log (p)</b> |
|--------------|------------|-------------------|----------------------|----------------|----------------|
| BIO6         | 4          | S04_36771335      | 36771335             | 9.02E-04       | 3.04           |
| BIO6         | 4          | S04_36785530      | 36785530             | 9.02E-04       | 3.04           |
| BIO6         | 4          | S04_36799625      | 36799625             | 9.02E-04       | 3.04           |
| BIO6         | 5          | S05_8091228       | 8091228              | 9.51E-04       | 3.02           |
| BIO6         | 6          | S06_13603868      | 13603868             | 9.51E-04       | 3.02           |
| BIO6         | 3          | S03_1711893       | 1711893              | 0.001          | 3.00           |
| BIO7         | 9          | S09_35475381      | 35475381             | 3.94E-05       | 4.40           |
| BIO7         | 1          | S01_43225566      | 43225566             | 6.91E-05       | 4.16           |
| BIO7         | 10         | S10_35224450      | 35224450             | 2.00E-04       | 3.70           |
| BIO7         | 5          | S05_8091228       | 8091228              | 2.45E-04       | 3.61           |
| BIO7         | 6          | S06_13603868      | 13603868             | 2.45E-04       | 3.61           |
| BIO7         | 7          | S07_44301353      | 44301353             | 2.73E-04       | 3.56           |
| BIO7         | 3          | S03_1711893       | 1711893              | 2.87E-04       | 3.54           |
| BIO7         | 4          | S04_19798525      | 19798525             | 4.97E-04       | 3.30           |
| BIO7         | 11         | S11_45868325      | 45868325             | 5.29E-04       | 3.28           |
| BIO7         | 11         | S11_46009051      | 46009051             | 5.29E-04       | 3.28           |
| BIO7         | 11         | S11_46026466      | 46026466             | 5.29E-04       | 3.28           |
| BIO7         | 11         | S11_46039222      | 46039222             | 5.29E-04       | 3.28           |
| BIO7         | 11         | S11_46086409      | 46086409             | 5.29E-04       | 3.28           |
| BIO7         | 11         | S11_46114790      | 46114790             | 5.29E-04       | 3.28           |
| BIO7         | 3          | S03_27967812      | 27967812             | 5.45E-04       | 3.26           |
| BIO7         | 11         | S11_45901957      | 45901957             | 5.46E-04       | 3.26           |
| BIO7         | 11         | S11_45976959      | 45976959             | 5.50E-04       | 3.26           |
| BIO7         | 11         | S11_45979384      | 45979384             | 5.50E-04       | 3.26           |
| BIO7         | 11         | S11_45927074      | 45927074             | 5.58E-04       | 3.25           |
| BIO7         | 11         | S11_45915796      | 45915796             | 5.61E-04       | 3.25           |
| BIO7         | 11         | S11_45871518      | 45871518             | 5.63E-04       | 3.25           |
| BIO7         | 9          | S09_30671474      | 30671474             | 8.65E-04       | 3.06           |
| BIO8         | 3          | S03_13038972      | 13038972             | 3.24E-04       | 3.49           |
| BIO8         | 6          | S06_18985703      | 18985703             | 8.76E-04       | 3.06           |
| BIO8         | 6          | S06_18968432      | 18968432             | 9.73E-04       | 3.01           |
| BIO9         | 9          | S09_35475381      | 35475381             | 1.32E-05       | 4.88           |
| BIO9         | 11         | S11_45868325      | 45868325             | 1.18E-04       | 3.93           |
| BIO9         | 11         | S11_45871518      | 45871518             | 1.19E-04       | 3.92           |
| BIO9         | 11         | S11_46009051      | 46009051             | 1.20E-04       | 3.92           |
| BIO9         | 11         | S11_46026466      | 46026466             | 1.20E-04       | 3.92           |
| BIO9         | 11         | S11_46039222      | 46039222             | 1.20E-04       | 3.92           |
| BIO9         | 11         | S11_46086409      | 46086409             | 1.20E-04       | 3.92           |
| BIO9         | 11         | S11_46114790      | 46114790             | 1.20E-04       | 3.92           |
| BIO9         | 11         | S11_45901957      | 45901957             | 1.22E-04       | 3.91           |
| BIO9         | 11         | S11_45976959      | 45976959             | 1.22E-04       | 3.91           |
| BIO9         | 11         | S11_45979384      | 45979384             | 1.22E-04       | 3.91           |
| BIO9         | 11         | S11_45915796      | 45915796             | 1.25E-04       | 3.90           |
| BIO9         | 11         | S11_45927074      | 45927074             | 1.25E-04       | 3.90           |
| BIO9         | 4          | S04_37237235      | 37237235             | 1.92E-04       | 3.72           |
| BIO9         | 9          | S09_35467033      | 35467033             | 2.66E-04       | 3.58           |
| BIO9         | 4          | S04_37276206      | 37276206             | 2.89E-04       | 3.54           |

| <b>Trait</b> | <b>Chr</b> | <b>SNP marker</b> | <b>Position (bp)</b> | <b>p value</b> | <b>Log (p)</b> |
|--------------|------------|-------------------|----------------------|----------------|----------------|
| BIO9         | 4          | S04_37323374      | 37323374             | 2.89E-04       | 3.54           |
| BIO9         | 4          | S04_37395494      | 37395494             | 2.89E-04       | 3.54           |
| BIO9         | 4          | S04_37402766      | 37402766             | 2.89E-04       | 3.54           |
| BIO9         | 4          | S04_37414095      | 37414095             | 2.89E-04       | 3.54           |
| BIO9         | 4          | S04_37419720      | 37419720             | 2.89E-04       | 3.54           |
| BIO9         | 4          | S04_36860255      | 36860255             | 2.96E-04       | 3.53           |
| BIO9         | 4          | S04_36862905      | 36862905             | 2.96E-04       | 3.53           |
| BIO9         | 4          | S04_36898781      | 36898781             | 2.96E-04       | 3.53           |
| BIO9         | 4          | S04_36904123      | 36904123             | 2.96E-04       | 3.53           |
| BIO9         | 4          | S04_36923093      | 36923093             | 2.96E-04       | 3.53           |
| BIO9         | 4          | S04_37014401      | 37014401             | 2.96E-04       | 3.53           |
| BIO9         | 4          | S04_37044048      | 37044048             | 2.96E-04       | 3.53           |
| BIO9         | 4          | S04_37127964      | 37127964             | 2.96E-04       | 3.53           |
| BIO9         | 4          | S04_37171730      | 37171730             | 2.96E-04       | 3.53           |
| BIO9         | 4          | S04_37230271      | 37230271             | 2.96E-04       | 3.53           |
| BIO9         | 4          | S04_37233909      | 37233909             | 2.96E-04       | 3.53           |
| BIO9         | 4          | S04_37244713      | 37244713             | 2.96E-04       | 3.53           |
| BIO9         | 4          | S04_37261263      | 37261263             | 2.96E-04       | 3.53           |
| BIO9         | 4          | S04_37352176      | 37352176             | 2.96E-04       | 3.53           |
| BIO9         | 4          | S04_37389504      | 37389504             | 2.96E-04       | 3.53           |
| BIO9         | 4          | S04_37403736      | 37403736             | 2.96E-04       | 3.53           |
| BIO9         | 4          | S04_37404528      | 37404528             | 2.96E-04       | 3.53           |
| BIO9         | 4          | S04_37404856      | 37404856             | 2.96E-04       | 3.53           |
| BIO9         | 4          | S04_37412126      | 37412126             | 2.96E-04       | 3.53           |
| BIO9         | 4          | S04_37413884      | 37413884             | 2.96E-04       | 3.53           |
| BIO9         | 4          | S04_37426790      | 37426790             | 2.96E-04       | 3.53           |
| BIO9         | 4          | S04_37432423      | 37432423             | 2.96E-04       | 3.53           |
| BIO9         | 4          | S04_37452775      | 37452775             | 2.96E-04       | 3.53           |
| BIO9         | 4          | S04_37490566      | 37490566             | 2.96E-04       | 3.53           |
| BIO9         | 4          | S04_37501169      | 37501169             | 2.96E-04       | 3.53           |
| BIO9         | 4          | S04_41844379      | 41844379             | 3.10E-04       | 3.51           |
| BIO9         | 4          | S04_41850026      | 41850026             | 3.10E-04       | 3.51           |
| BIO9         | 4          | S04_41819945      | 41819945             | 3.11E-04       | 3.51           |
| BIO9         | 4          | S04_41865996      | 41865996             | 3.11E-04       | 3.51           |
| BIO9         | 4          | S04_41921556      | 41921556             | 3.11E-04       | 3.51           |
| BIO9         | 9          | S09_30671474      | 30671474             | 3.56E-04       | 3.45           |
| BIO9         | 4          | S04_36739231      | 36739231             | 3.78E-04       | 3.42           |
| BIO9         | 4          | S04_36792247      | 36792247             | 3.78E-04       | 3.42           |
| BIO9         | 4          | S04_36807595      | 36807595             | 3.78E-04       | 3.42           |
| BIO9         | 4          | S04_36858132      | 36858132             | 3.78E-04       | 3.42           |
| BIO9         | 4          | S04_36859433      | 36859433             | 3.78E-04       | 3.42           |
| BIO9         | 4          | S04_36860736      | 36860736             | 3.78E-04       | 3.42           |
| BIO9         | 4          | S04_36862528      | 36862528             | 3.78E-04       | 3.42           |
| BIO9         | 4          | S04_36867546      | 36867546             | 3.78E-04       | 3.42           |
| BIO9         | 4          | S04_36891598      | 36891598             | 3.78E-04       | 3.42           |
| BIO9         | 4          | S04_36915727      | 36915727             | 3.78E-04       | 3.42           |
| BIO9         | 4          | S04_36920211      | 36920211             | 3.78E-04       | 3.42           |

| <b>Trait</b> | <b>Chr</b> | <b>SNP marker</b> | <b>Position (bp)</b> | <b>p value</b> | <b>Log (p)</b> |
|--------------|------------|-------------------|----------------------|----------------|----------------|
| BIO9         | 4          | S04_36967857      | 36967857             | 3.78E-04       | 3.42           |
| BIO9         | 4          | S04_36984541      | 36984541             | 3.78E-04       | 3.42           |
| BIO9         | 4          | S04_37002724      | 37002724             | 3.78E-04       | 3.42           |
| BIO9         | 4          | S04_37133177      | 37133177             | 3.78E-04       | 3.42           |
| BIO9         | 4          | S04_37165570      | 37165570             | 3.78E-04       | 3.42           |
| BIO9         | 11         | S11_48597386      | 48597386             | 4.10E-04       | 3.39           |
| BIO9         | 2          | S02_46562876      | 46562876             | 4.13E-04       | 3.38           |
| BIO9         | 2          | S02_46767945      | 46767945             | 4.13E-04       | 3.38           |
| BIO9         | 2          | S02_46774037      | 46774037             | 4.13E-04       | 3.38           |
| BIO9         | 2          | S02_46778765      | 46778765             | 4.13E-04       | 3.38           |
| BIO9         | 9          | S09_16894313      | 16894313             | 4.13E-04       | 3.38           |
| BIO9         | 9          | S09_17041160      | 17041160             | 4.13E-04       | 3.38           |
| BIO9         | 11         | S11_48564887      | 48564887             | 4.13E-04       | 3.38           |
| BIO9         | 11         | S11_48574427      | 48574427             | 4.13E-04       | 3.38           |
| BIO9         | 11         | S11_48590179      | 48590179             | 4.13E-04       | 3.38           |
| BIO9         | 11         | S11_48595485      | 48595485             | 4.13E-04       | 3.38           |
| BIO9         | 11         | S11_48673230      | 48673230             | 4.13E-04       | 3.38           |
| BIO9         | 11         | S11_48691105      | 48691105             | 4.13E-04       | 3.38           |
| BIO9         | 11         | S11_48717102      | 48717102             | 4.13E-04       | 3.38           |
| BIO9         | 11         | S11_48754682      | 48754682             | 4.13E-04       | 3.38           |
| BIO9         | 11         | S11_48769163      | 48769163             | 4.13E-04       | 3.38           |
| BIO9         | 11         | S11_48771356      | 48771356             | 4.13E-04       | 3.38           |
| BIO9         | 11         | S11_48790698      | 48790698             | 4.13E-04       | 3.38           |
| BIO9         | 11         | S11_48890465      | 48890465             | 4.13E-04       | 3.38           |
| BIO9         | 7          | S07_44301353      | 44301353             | 4.20E-04       | 3.38           |
| BIO9         | 10         | S10_35224450      | 35224450             | 4.38E-04       | 3.36           |
| BIO9         | 5          | S05_8091228       | 8091228              | 4.80E-04       | 3.32           |
| BIO9         | 6          | S06_13603868      | 13603868             | 4.80E-04       | 3.32           |
| BIO9         | 2          | S02_46595538      | 46595538             | 4.83E-04       | 3.32           |
| BIO9         | 2          | S02_46636403      | 46636403             | 4.86E-04       | 3.31           |
| BIO9         | 3          | S03_1711893       | 1711893              | 4.95E-04       | 3.31           |
| BIO9         | 4          | S04_19798525      | 19798525             | 6.10E-04       | 3.21           |
| BIO9         | 9          | S09_4156404       | 4156404              | 8.13E-04       | 3.09           |
| BIO9         | 3          | S03_27967812      | 27967812             | 8.61E-04       | 3.06           |
| BIO9         | 1          | S01_48656150      | 48656150             | 8.64E-04       | 3.06           |
| BIO9         | 9          | S09_36970219      | 36970219             | 9.35E-04       | 3.03           |
| BIO9         | 9          | S09_36440025      | 36440025             | 9.63E-04       | 3.02           |
| BIO10        | 3          | S03_13038972      | 13038972             | 6.72E-04       | 3.17           |
| BIO10        | 2          | S02_4770785       | 4770785              | 7.02E-04       | 3.15           |
| BIO10        | 2          | S02_23499179      | 23499179             | 7.99E-04       | 3.10           |
| BIO10        | 2          | S02_23522351      | 23522351             | 7.99E-04       | 3.10           |
| BIO10        | 2          | S02_23929739      | 23929739             | 7.99E-04       | 3.10           |
| BIO12        | 2          | S02_5007350       | 5007350              | 6.98E-04       | 3.16           |
| BIO12        | 3          | S03_13038972      | 13038972             | 7.68E-04       | 3.11           |
| BIO13        | 2          | S02_4770785       | 4770785              | 2.47E-04       | 3.61           |
| BIO13        | 2          | S02_5007350       | 5007350              | 5.63E-04       | 3.25           |
| BIO13        | 2          | S02_4757674       | 4757674              | 6.14E-04       | 3.21           |

| <b>Trait</b> | <b>Chr</b> | <b>SNP marker</b> | <b>Position (bp)</b> | <b>p value</b> | <b>Log (p)</b> |
|--------------|------------|-------------------|----------------------|----------------|----------------|
| BIO13        | 2          | S02_6708073       | 6708073              | 6.46E-04       | 3.19           |
| BIO13        | 2          | S02_5727181       | 5727181              | 6.71E-04       | 3.17           |
| BIO13        | 2          | S02_5731880       | 5731880              | 6.71E-04       | 3.17           |
| BIO13        | 2          | S02_5738610       | 5738610              | 6.71E-04       | 3.17           |
| BIO13        | 2          | S02_5750826       | 5750826              | 6.71E-04       | 3.17           |
| BIO13        | 2          | S02_5765322       | 5765322              | 6.71E-04       | 3.17           |
| BIO13        | 2          | S02_5766404       | 5766404              | 6.71E-04       | 3.17           |
| BIO13        | 2          | S02_5817835       | 5817835              | 6.71E-04       | 3.17           |
| BIO13        | 2          | S02_5916263       | 5916263              | 6.71E-04       | 3.17           |
| BIO13        | 2          | S02_4963284       | 4963284              | 7.83E-04       | 3.11           |
| BIO14        | 9          | S09_35475381      | 35475381             | 1.93E-07       | 6.71           |
| BIO14        | 9          | S09_30671474      | 30671474             | 1.01E-06       | 6.00           |
| BIO14        | 2          | S02_46636403      | 46636403             | 1.08E-06       | 5.97           |
| BIO14        | 2          | S02_46562876      | 46562876             | 1.12E-06       | 5.95           |
| BIO14        | 2          | S02_46767945      | 46767945             | 1.12E-06       | 5.95           |
| BIO14        | 2          | S02_46774037      | 46774037             | 1.12E-06       | 5.95           |
| BIO14        | 2          | S02_46778765      | 46778765             | 1.12E-06       | 5.95           |
| BIO14        | 9          | S09_16894313      | 16894313             | 1.12E-06       | 5.95           |
| BIO14        | 9          | S09_17041160      | 17041160             | 1.12E-06       | 5.95           |
| BIO14        | 11         | S11_48564887      | 48564887             | 1.16E-06       | 5.94           |
| BIO14        | 11         | S11_48574427      | 48574427             | 1.16E-06       | 5.94           |
| BIO14        | 11         | S11_48590179      | 48590179             | 1.16E-06       | 5.94           |
| BIO14        | 11         | S11_48595485      | 48595485             | 1.16E-06       | 5.94           |
| BIO14        | 11         | S11_48673230      | 48673230             | 1.16E-06       | 5.94           |
| BIO14        | 11         | S11_48691105      | 48691105             | 1.16E-06       | 5.94           |
| BIO14        | 11         | S11_48717102      | 48717102             | 1.16E-06       | 5.94           |
| BIO14        | 11         | S11_48754682      | 48754682             | 1.16E-06       | 5.94           |
| BIO14        | 11         | S11_48769163      | 48769163             | 1.16E-06       | 5.94           |
| BIO14        | 11         | S11_48771356      | 48771356             | 1.16E-06       | 5.94           |
| BIO14        | 11         | S11_48790698      | 48790698             | 1.16E-06       | 5.94           |
| BIO14        | 11         | S11_48890465      | 48890465             | 1.16E-06       | 5.94           |
| BIO14        | 2          | S02_46595538      | 46595538             | 1.20E-06       | 5.92           |
| BIO14        | 11         | S11_48597386      | 48597386             | 1.20E-06       | 5.92           |
| BIO14        | 9          | S09_36970219      | 36970219             | 1.43E-06       | 5.84           |
| BIO14        | 9          | S09_36440025      | 36440025             | 1.44E-06       | 5.84           |
| BIO15        | 9          | S09_35475381      | 35475381             | 1.65E-06       | 5.78           |
| BIO16        | 2          | S02_4770785       | 4770785              | 3.15E-04       | 3.50           |
| BIO16        | 4          | S04_36754502      | 36754502             | 4.15E-04       | 3.38           |
| BIO16        | 4          | S04_36771335      | 36771335             | 4.15E-04       | 3.38           |
| BIO16        | 4          | S04_36785530      | 36785530             | 4.15E-04       | 3.38           |
| BIO16        | 4          | S04_36799625      | 36799625             | 4.15E-04       | 3.38           |
| BIO16        | 5          | S05_34603354      | 34603354             | 4.53E-04       | 3.34           |
| BIO16        | 2          | S02_5007350       | 5007350              | 5.79E-04       | 3.24           |
| BIO16        | 2          | S02_4757674       | 4757674              | 7.72E-04       | 3.11           |
| BIO16        | 2          | S02_4963284       | 4963284              | 9.35E-04       | 3.03           |
| BIO16        | 2          | S02_4766445       | 4766445              | 0.001          | 3.00           |
| BIO17        | 9          | S09_35475381      | 35475381             | 9.48E-08       | 7.02           |

| <b>Trait</b> | <b>Chr</b> | <b>SNP marker</b> | <b>Position (bp)</b> | <b>p value</b> | <b>Log (p)</b> |
|--------------|------------|-------------------|----------------------|----------------|----------------|
| BIO17        | 9          | S09_30671474      | 30671474             | 1.11E-06       | 5.95           |
| BIO17        | 2          | S02_46636403      | 46636403             | 1.23E-06       | 5.91           |
| BIO17        | 2          | S02_46562876      | 46562876             | 1.24E-06       | 5.91           |
| BIO17        | 2          | S02_46767945      | 46767945             | 1.24E-06       | 5.91           |
| BIO17        | 2          | S02_46774037      | 46774037             | 1.24E-06       | 5.91           |
| BIO17        | 2          | S02_46778765      | 46778765             | 1.24E-06       | 5.91           |
| BIO17        | 9          | S09_16894313      | 16894313             | 1.24E-06       | 5.91           |
| BIO17        | 9          | S09_17041160      | 17041160             | 1.24E-06       | 5.91           |
| BIO17        | 11         | S11_48564887      | 48564887             | 1.30E-06       | 5.89           |
| BIO17        | 11         | S11_48574427      | 48574427             | 1.30E-06       | 5.89           |
| BIO17        | 11         | S11_48590179      | 48590179             | 1.30E-06       | 5.89           |
| BIO17        | 11         | S11_48595485      | 48595485             | 1.30E-06       | 5.89           |
| BIO17        | 11         | S11_48673230      | 48673230             | 1.30E-06       | 5.89           |
| BIO17        | 11         | S11_48691105      | 48691105             | 1.30E-06       | 5.89           |
| BIO17        | 11         | S11_48717102      | 48717102             | 1.30E-06       | 5.89           |
| BIO17        | 11         | S11_48754682      | 48754682             | 1.30E-06       | 5.89           |
| BIO17        | 11         | S11_48769163      | 48769163             | 1.30E-06       | 5.89           |
| BIO17        | 11         | S11_48771356      | 48771356             | 1.30E-06       | 5.89           |
| BIO17        | 11         | S11_48790698      | 48790698             | 1.30E-06       | 5.89           |
| BIO17        | 11         | S11_48890465      | 48890465             | 1.30E-06       | 5.89           |
| BIO17        | 11         | S11_48597386      | 48597386             | 1.34E-06       | 5.87           |
| BIO17        | 2          | S02_46595538      | 46595538             | 1.35E-06       | 5.87           |
| BIO17        | 9          | S09_36970219      | 36970219             | 1.74E-06       | 5.76           |
| BIO17        | 9          | S09_36440025      | 36440025             | 1.75E-06       | 5.76           |
| BIO18        | 11         | S11_9167649       | 9167649              | 7.86E-04       | 3.10           |
| BIO18        | 1          | S01_43225566      | 43225566             | 8.74E-04       | 3.06           |
| BIO18        | 2          | S02_11742975      | 11742975             | 0.001          | 3.00           |
| BIO19        | 4          | S04_36754502      | 36754502             | 1.37E-04       | 3.86           |
| BIO19        | 4          | S04_36771335      | 36771335             | 1.37E-04       | 3.86           |
| BIO19        | 4          | S04_36785530      | 36785530             | 1.37E-04       | 3.86           |
| BIO19        | 4          | S04_36799625      | 36799625             | 1.37E-04       | 3.86           |
| BIO19        | 5          | S05_34603354      | 34603354             | 1.71E-04       | 3.77           |
| BIO19        | 11         | S11_12127792      | 12127792             | 7.01E-04       | 3.15           |
| BIO19        | 5          | S05_34925867      | 34925867             | 7.24E-04       | 3.14           |
| BIO19        | 11         | S11_11008392      | 11008392             | 7.24E-04       | 3.14           |
| BIO19        | 6          | S06_30688446      | 30688446             | 8.55E-04       | 3.07           |
